# Supplementary material for: The Pleasuremeter: exploring the links between sexual health, sexual rights and sexual pleasure in sexual history-taking, SRHR counselling and education
Source: PubMed Central journal article supplement — Sex Reprod Health Matters. 2019 Nov 22;27(1):313–5. doi: 10.1080/26410397.2019.1690334 (PMC7887986; doi:10.1080/26410397.2019.1690334), 2019-11-22
Supplement: ZRHM_A_1690334_SM3853.pdf [file ZRHM_A_1690334_SM3853.pdf]

**Supplementary Material #1.**

**Step #1 of the *Pleasuremeter*: Scoring.**

| Think about all your sexual relationships in the last 12 (3 or 6) months and answer the following questions:                                      |                                                                               |                                                                                                   |                                                                    |                                                                        |                                                                                    |                                                                                                                                                     |
|---------------------------------------------------------------------------------------------------------------------------------------------------|-------------------------------------------------------------------------------|---------------------------------------------------------------------------------------------------|--------------------------------------------------------------------|------------------------------------------------------------------------|------------------------------------------------------------------------------------|-----------------------------------------------------------------------------------------------------------------------------------------------------|
| Physical and psychological satisfaction or enjoyment (Sexual pleasure)                                                                            | Self-determination                                                            | Consent                                                                                           | Safety                                                             | Privacy                                                                | Confidence                                                                         | Communication/negotiation                                                                                                                           |
| From 1 to 10 (or 1 to 5), how much did you enjoy (or how satisfied you were with or how much pleasure did you have with) your sexual experiences? | From 1 to 10, how free did you feel to make choices regarding your sexuality? | From 1 to 10, of all the things you did with your sexual partner(s), how many did you consent to? | From, 1 to 10, how safe did you feel in your sexual relationships? | From 1 to 10, how much privacy did you have in your sexual encounters? | From 1 to 10, how confident did you feel to express yourself with your partner(s)? | From 1 to 10, how would you rate the quality of your communication and negotiation (of what you wanted and didn't want to do) with your partner(s)? |

**Spider-web diagram to document the scores provided by the client:**

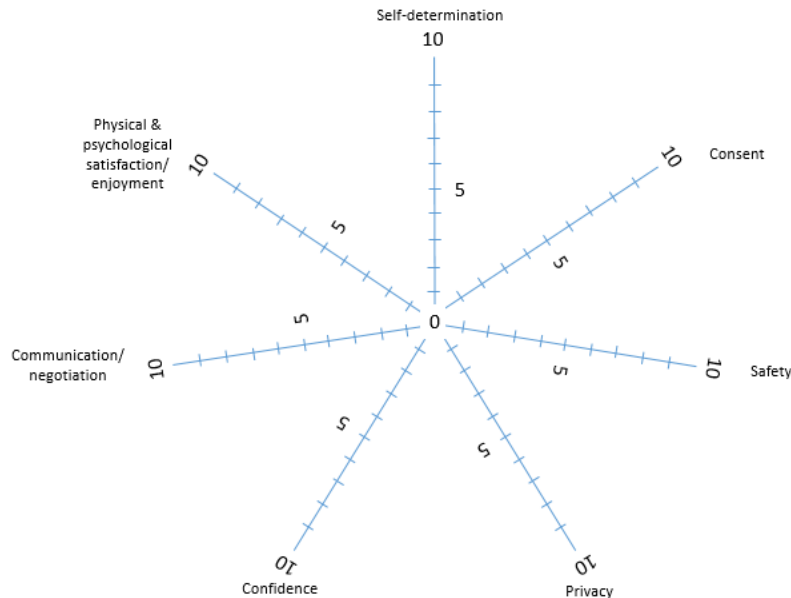

Source: *The Global Advisory Board (GAB) for Sexual Health and Wellbeing, 2018*  
Intellectual property of the GAB with support from RB/Durex. All rights reserved.

Antón Castellanos-Usigli & Doortje Braeken-van Schaik (2019) The Pleasuremeter: exploring the links between sexual health, sexual rights and sexual pleasure in sexual history-taking, SRHR counselling and education, *Sexual and Reproductive Health Matters*, 27:1, 1-3, DOI: [10.1080/26410397.2019.1690334](https://doi.org/10.1080/26410397.2019.1690334)
